# Supplementary material for: The Aβ peptide forms non-amyloid fibrils in the presence of carbon nanotubes
Source: Royal Society of Chemistry journal article supplement (doi:10.1039/c4nr00291a), 2014-01-01
Supplement: c4nr00291a1.pdf [file c4nr00291a1.pdf]

### Supplementary information

**Table S1. The Glutaraldehyde cross-linked assay of insulin fibrils. The 25  $\mu$ M insulin fibrils were obtained by incubating 25  $\mu$ M insulin in pH1.0 at 37°C for 15 hours. Afterwards, 5% glutaraldehyde at the final concentration was added to each solution for stablizing the fibril structure. Subsequently, the fluorescence intensity of ThT were decreased after adding SWNTs suggesting that SWNTs can clelate ThT from fibrils.**

| The<br>fluorescence<br>intensity | After 0h<br>incubation<br>at 37°C | After 15h<br>incubation<br>at 37°C | After 10min<br>incubation<br>with 5%<br>glutaraldehyde<br>at 37°C | Cross linked insulin fibrils After<br>adding SWNTS | After 5min<br>incubation<br>at 37°C |       |
|----------------------------------|-----------------------------------|------------------------------------|-------------------------------------------------------------------|----------------------------------------------------|-------------------------------------|-------|
| 20μM<br>Insulin                  | 2802                              | 22214                              | 18477                                                             | 20μM Insulin                                       | 13143                               | 11644 |
| 20μM<br>Insulin                  | 2862                              | 25332                              | 21533                                                             | 20μM<br>Insulin_0.05mg/ml<br>SWNTs                 | 2095                                | 1812  |
| 20μM<br>Insulin                  | 2807                              | 37356                              | 32274                                                             | 20μM<br>Insulin_0.005mg/ml<br>SWNTs                | 10341                               | 9088  |
| 20μM<br>Insulin                  | 2856                              | 39949                              | 36667                                                             | 20μM<br>Insulin_0.0005mg/ml<br>SWNTs               | 26347                               | 24050 |

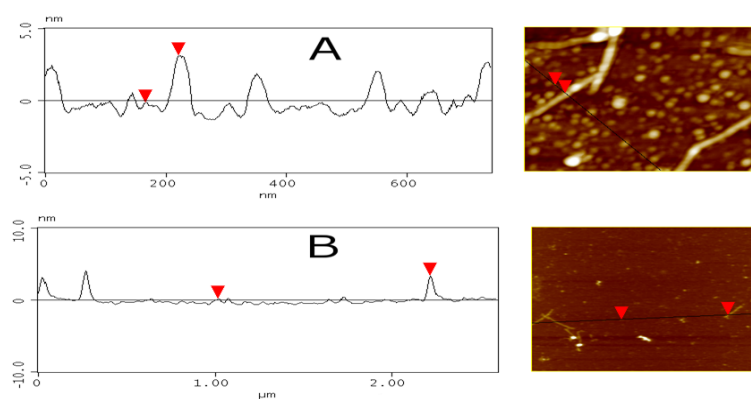

**Figure S1.** The heights of amyloid beta peptide(a) and SWNTs(b) after 1 hour incubation at 37 degree, 200 rpm in shaker. The height of amyloid beta peptide and SWNTs are 3.3 and 3.2 nm, respectively. The sizes of a and b images are 800×800nm and 2300×2300nm, respectively.

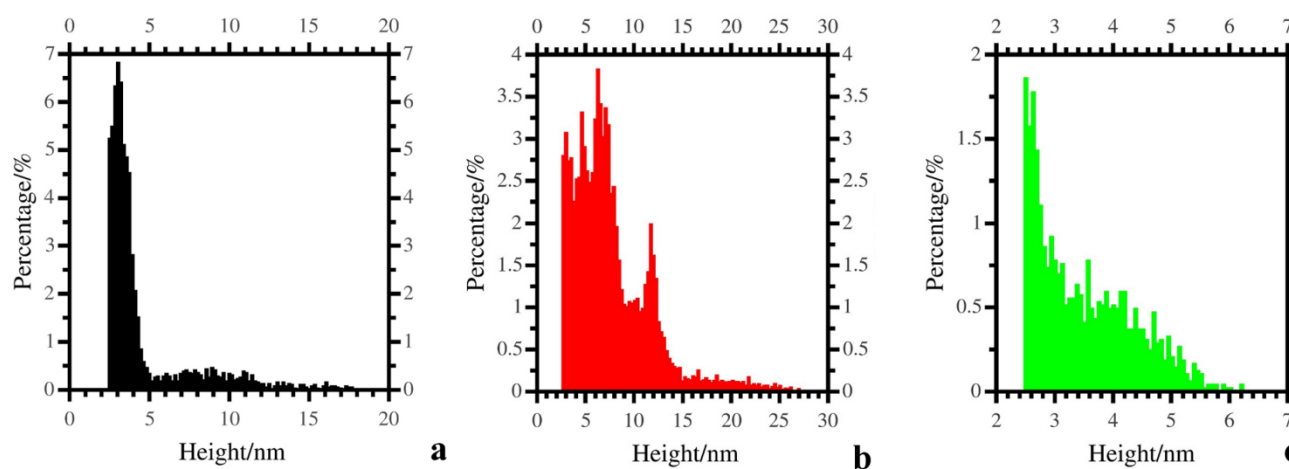

**Figure S2.** The height distribution corresponding to figure 2 of A $\beta$ -coated SWNTs at pH5.5(a), pH7.4(b) and pH9(c).

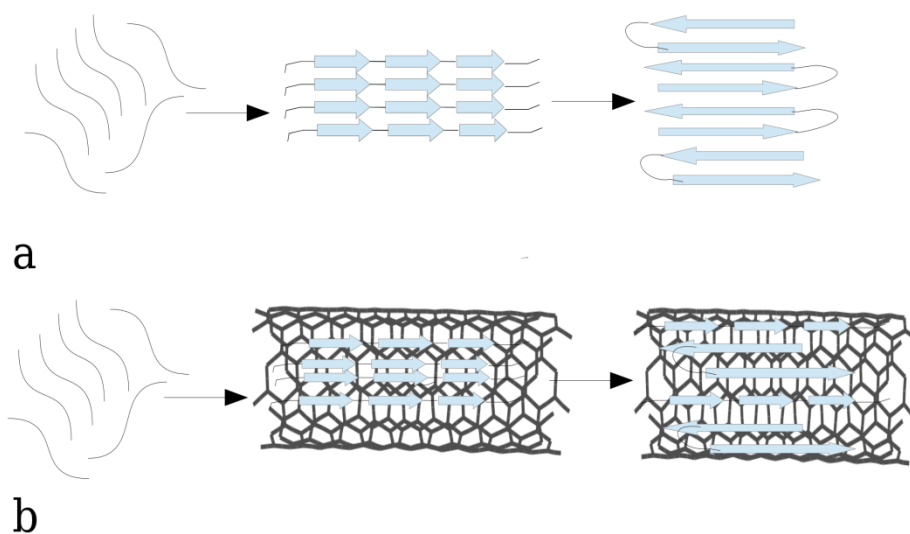

**Figure S2. Cartoon illustration of the proposed A $\beta$  peptide aggregation in (a) the absence and (b) the presence of SWNTs. In the absence of SWNTs, antiparallel cross-beta strands are formed after the formation of parallel beta strands, and then coalesce into the amyloid fibril. In the presence of SWNTs, the parallel beta strands are scavenged by the SWNTs and the structural rearrangement of these parallel beta sheets into the cross-beta structure on the SWNTs is slow.**
